# Supplementary material for: SMOC2 promoted vascular smooth muscle cell proliferation, migration, and extracellular matrix degradation by activating BMP/TGF‐β1 signaling pathway
Source: PubMed Central journal article supplement — J Clin Biochem Nutr. 2023 Jul 5;73(2):116–23. doi: 10.3164/jcbn.22-100 (PMC10493216; doi:10.3164/jcbn.22-100), 2023-07-05
Supplement: jcbn22-100_1.pdf [file jcbn22-100_1.pdf]

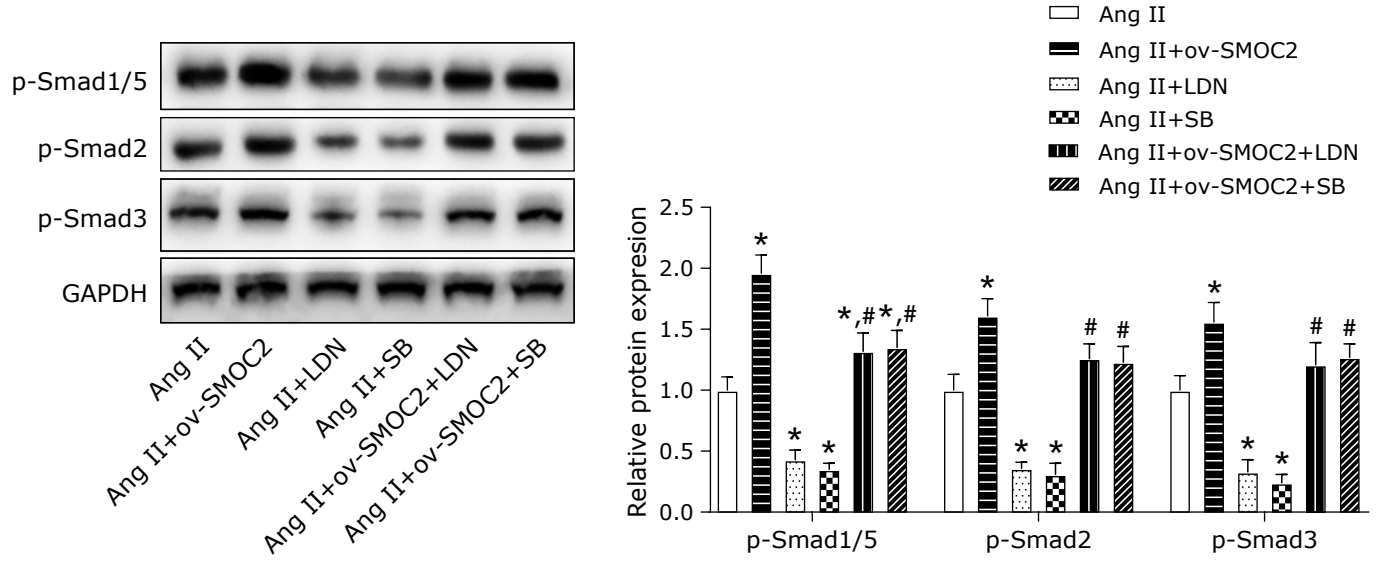

**Supplemental Fig. 1.** The BMP receptor inhibitor LDN193189 (LDN), and TGF- $\beta$ 1 receptor inhibitor SB431542 (SB) inhibited the expression of p-Smad1/5, p-Smad2, and p-Smad3. One-way ANOVA was used for statistical analysis. \* $p < 0.05$  compared to Ang II group. # $p < 0.05$  compared to Ang II+ov-SMOC2 group.
